RESEARCH ARTICLE

# Exercise Intensity Modulates Glucose-Stimulated Insulin Secretion when Adjusted for Adipose, Liver and Skeletal Muscle Insulin Resistance

Steven K. Malin<sup>1,2,3\*</sup>, Corey A. Rynders<sup>4</sup>, Judy Y. Weltman<sup>3</sup>, Eugene J. Barrett<sup>2</sup>, Arthur Weltman<sup>1,2,3</sup>

**1** Department of Kinesiology, University of Virginia, Charlottesville, VA, United States of America, **2** Division of Endocrinology and Metabolism, University of Virginia, Charlottesville, VA, United States of America, **3** Exercise Physiology Core Laboratory, University of Virginia, Charlottesville, VA, United States of America, **4** Division of Geriatric Medicine, University of Colorado Anschutz Medical Campus, Aurora, Colorado, United States of America

\* [skm6n@virginia.edu](mailto:skm6n@virginia.edu)

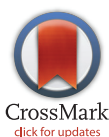

**OPEN ACCESS**

**Citation:** Malin SK, Rynders CA, Weltman JY, Barrett EJ, Weltman A (2016) Exercise Intensity Modulates Glucose-Stimulated Insulin Secretion when Adjusted for Adipose, Liver and Skeletal Muscle Insulin Resistance. PLoS ONE 11(4): e0154063. doi:10.1371/journal.pone.0154063

**Editor:** Andrew Philp, University of Birmingham, UNITED KINGDOM

**Received:** October 30, 2015

**Accepted:** April 7, 2016

**Published:** April 25, 2016

**Copyright:** © 2016 Malin et al. This is an open access article distributed under the terms of the [Creative Commons Attribution License](https://creativecommons.org/licenses/by/4.0/), which permits unrestricted use, distribution, and reproduction in any medium, provided the original author and source are credited.

**Data Availability Statement:** All relevant data are within the paper and its Supporting Information Files.

**Funding:** This research was supported by the Curry School of Education Foundation (SKM) and Virginia Commonwealth Health Research Board and NIH-RR00847 (AW). The funders had no role in study design, data collection and analysis, decision to publish, or preparation of the manuscript.

**Competing Interests:** The authors have declared that no competing interests exist.

## Abstract

Little is known about the effects of exercise intensity on compensatory changes in glucose-stimulated insulin secretion (GSIS) when adjusted for adipose, liver and skeletal muscle insulin resistance (IR). Fifteen participants (8F, Age: 49.9±3.6yr; BMI: 31.0±1.5kg/m<sup>2</sup>; VO<sub>2</sub>peak: 23.2±1.2mg/kg/min) with prediabetes (ADA criteria, 75g OGTT and/or HbA<sub>1c</sub>) underwent a time-course matched Control, and isocaloric (200kcal) exercise at moderate (MIE; at lactate threshold (LT)), and high-intensity (HIE; 75% of difference between LT and VO<sub>2</sub>peak). A 75g OGTT was conducted 1 hour post-exercise/Control, and plasma glucose, insulin, C-peptide and free fatty acids were determined for calculations of skeletal muscle (1/Oral Minimal Model; SM<sub>IR</sub>), hepatic (HOMA<sub>IR</sub>), and adipose (ADIPOSE<sub>IR</sub>) IR. Insulin secretion rates were determined by deconvolution modeling for GSIS, and disposition index (DI; GSIS/IR; DI<sub>SMIR</sub>, DI<sub>HOMAIR</sub>, DI<sub>ADIPOSEIR</sub>) calculations. Compared to Control, exercise lowered SM<sub>IR</sub> independent of intensity ( $P<0.05$ ), with HIE raising HOMA<sub>IR</sub> and ADIPOSE<sub>IR</sub> compared with Control ( $P<0.05$ ). GSIS was not reduced following exercise, but DI<sub>HOMAIR</sub> and DI<sub>ADIPOSEIR</sub> were lowered more following HIE compared with Control ( $P<0.05$ ). However, DI<sub>SMIR</sub> increased in an intensity based manner relative to Control ( $P<0.05$ ), which corresponded with lower post-prandial blood glucose levels. Taken together, pancreatic insulin secretion adjusts in an exercise intensity dependent manner to match the level of insulin resistance in skeletal muscle, liver and adipose tissue. Further work is warranted to understand the mechanism by which exercise influences the cross-talk between tissues that regulate blood glucose in people with prediabetes.

## Introduction

Nearly 470 million worldwide have prediabetes [1], with approximately 86 million individuals in the U.S. population being diagnosed [2,3]. Insulin resistance in skeletal muscle, liver and adipose tissue are considered major etiological factors in the conversion from prediabetes to frank type 2 diabetes [4]. However, many people with insulin resistance maintain normal glycaemia due to compensatory rises in pancreatic insulin secretion. Subsequently, maintaining the capacity of  $\beta$ -cells to secrete adequate amounts of insulin in response to multi-organ insulin resistance is paramount to preventing progression from prediabetes to type 2 diabetes [5].

Exercise training reduces glucose-stimulated responses to carbohydrate consumption [6–10]. However, glucose-stimulated insulin secretion (GSIS) is influenced by the prevailing level of multi-organ insulin sensitivity, such that the product of GSIS and insulin sensitivity (i.e. disposition index) may provide a more accurate view of  $\beta$ -cell function [10]. In fact, pancreatic function is considered a better predictor of future diabetes development than insulin sensitivity alone [11–13]. Thus, identifying the optimal dose at which exercise effects pancreatic function is of pressing clinical need [13–16]. Although recent evidence suggests that high intensity exercise training confers high cardiometabolic benefit (e.g. reduction in abdominal visceral fat, total cholesterol and/or blood pressure), less attention has been directed at understanding the dose of exercise required to optimize insulin sensitivity and  $\beta$ -cell function [16–18]. In fact, no study to date has determined the effect of exercise intensity on  $\beta$ -cell function independent of weight loss or enhanced cardiorespiratory fitness. We recently demonstrated that acute high intensity exercise lowered post-prandial blood glucose more than an isocaloric bout of moderate intensity exercise in men and women with prediabetes, but the role of pancreatic function was not assessed [19]. Therefore, the purpose this study was to test the effect of exercise intensity on  $\beta$ -cell function to determine if this change in insulin secretion would correspond with favorable changes in blood glucose. Given that high intensity exercise in our prior work [19] improved postprandial blood glucose more than moderate intensity exercise, we hypothesized that changes in GSIS adjusted for skeletal muscle, liver and/or adipose insulin resistance may in part explain this improved glycemic control response in men and women.

## Materials and Methods

### Participants

These were the same individuals who were included in our prior study on glucose tolerance [19], but only 15 participants were studied here for further analysis on pancreatic function due to technical difficulty with FFA analysis ( $n = 3$ ). Participants were recruited via advertisements in the local community. Prediabetes was defined as either a fasting plasma glucose between 100–126 mg/dl, 2 hour glucose between 140–200 mg/dl after a 75g oral glucose tolerance test (OGTT), and/or HbA<sub>1c</sub> values between 5.7–6.4%. All men and women were non-smoking and sedentary (exercise < 30 min/d, < 3 d/wk) and underwent medical history and physical examination that included a resting and exercise stress test with 12-lead electrocardiogram as done previously [20]. Blood and urine chemistry analysis was also conducted to exclude people with type 2 diabetes, liver disease, cardiac dysfunction, pulmonary abnormalities and renal/liver complications. Pre-menopausal women were studied during the early follicular phase (days 2–8) of the menstrual cycle, and participants were excluded if taking medications considered to impact glucose metabolism [21–23]. All participants provided written signed and verbal informed consent and this study was approved by the University of Virginia Institutional Review Board.

## Body Composition and Aerobic Fitness

Weight was assessed on a digital platform with minimal clothing, and height was recorded with a stadiometer. Body fat and fat-free mass was measured using air displacement plethysmography (BodPod, Cosmed, Concord, CA) corrected for thoracic gas volume [20]. Participants completed a  $\text{VO}_2$ peak/lactate threshold cycle ergometer test using open-circuit spirometric techniques (Viasys Vmax Encore, Yorba Linda, CA). An indwelling catheter was inserted in a forearm vein and blood samples were taken at rest and at the end of each exercise stage for blood lactate analysis (YSI Instruments 2700, Yellow Springs, OH). Lactate threshold was determined from the blood lactate-power output relationship and was defined as the highest power output attained prior to the curvilinear increase in blood lactate above baseline.

## Metabolic Control

Participants were instructed to consume ~200 g/d of carbohydrate for 72 hours prior to testing. A 3 d food diary was used to record dietary intake each day, and participants were instructed to repeat this same diet for all testing conditions. Participants were also instructed to refrain from alcohol, caffeine, and vigorous physical activity for at least 72 hour prior to their OGTT.

## Exercise/Control Conditions

Participants reported to the Exercise Physiology Core Laboratory on three separate occasions, after a 10–12 hour overnight fast, and completed randomly assigned control (rest for 1 hour) and 200-kcal bouts of moderate intensity exercise (at lactate threshold) or high intensity exercise (75% of the difference between lactate threshold and  $\text{VO}_2$ peak). The time required to expend 200-kcal was calculated from  $\text{VO}_2$ peak values [19].

## Insulin Resistance and Pancreatic $\beta$ -cell Function

One hour following exercise or rest conditions, participants received a 75g OGTT. Blood samples were obtained from an antecubital vein for the determination of substrates. Free fatty acids (FFAs) were determined at 0, 30 and 120 min to provide an assessment of lipid metabolism. Glucose, insulin and C-peptide total area under the curve (AUC) during the OGTT was calculated using the trapezoidal rule from data at 0, 30, 60, 90, and 120 minutes as previously performed by our group and others [16,24,25]. Skeletal muscle insulin resistance was calculated using the inverse of the oral glucose minimal model, which has been validated against the euglycemic clamp technique [26,27]. Hepatic and adipose insulin resistance were estimated by multiplying fasting glucose and FFAs by fasting insulin, respectively. Pre-hepatic insulin secretion rate (ISR) was reconstructed by deconvolution from plasma C-peptide [27]. C-peptide was utilized to characterize insulin secretion to minimize influences of insulin clearance on pancreatic function assessment. Thus, GSIS was calculated as AUC of ISR divided by glucose during the OGTT to provide more accurate depictions of insulin secretion [28,29]. Early (0–30 minutes) and total phase (0–120 minutes)  $\beta$ -cell function, or disposition index, relative to skeletal muscle was calculated as GSIS x 1/oral glucose minimal model.  $\beta$ -cell function relative to hepatic and adipose insulin resistance was also calculated as GSIS x (1/HOMA-IR or 1/Adipose-IR). Hepatic insulin clearance was estimated by dividing AUC of C-peptide by insulin during the OGTT.

## Biochemical Analysis

Plasma glucose was analyzed by a glucose oxidase assay (YSI Instruments 2700, Yellow Springs, OH). Remaining samples were stored at  $-80^\circ\text{C}$  until later batched-analysis and all samples were

run in duplicate to minimize variance within conditions. Insulin and C-peptide concentrations were measured using a chemiluminescent immunometric assay (Diagnostic Products Corporation, Immulite 2000, Los Angeles, CA). Plasma FFAs were determined by a colorimetric assay (Wako Chemicals, Richmond, VA).

### Statistical Analysis

Data were analyzed using the statistical program R (The R Foundation, Vienna, Austria 2013). Skewed data were log transformed for statistical analysis to meet normality requirements. Data were compared across conditions using a repeated measures one way analysis of variance. Pairwise comparisons were used to identify the source of significance in the event of a significant main effect. Because men and women typically differ in body composition and differences in body fat may impact insulin secretion, sex was used as a co-variate to confirm the effect of exercise intensity on pancreatic function. Pearson’s correlation was used to determine associations. Data are reported as mean ± standard error of mean or median (IQR) when data were not normally distributed. Significance was accepted as  $P \leq 0.05$ .

## Results

### Participant and Exercise Characteristics

Participants were middle-aged (49.9±3.6 yr), obese (BMI: 31.0±1.5 kg/m<sup>2</sup> and body fat: 40.6 ±1.5%) and had poor cardiorespiratory fitness (VO<sub>2</sub>peak: 23.2±1.2 mg/kg/min). Participants also had on average normal fasting glucose and impaired glucose tolerance following the 75g OGTT (2 hour glucose: 170.2±8.8 mg/dl; Table 1). Individuals performed moderate intensity exercise (67.5±1.4% of VO<sub>2</sub>peak for 41.6±2.3 min) and high intensity exercise (90.2±1.3% of VO<sub>2</sub>peak for 23.7±1.3 min) until 200-kcal were expended.

### Glucose, Insulin and FFA Metabolism

As shown in our previous report [19], exercise-induced reductions in post-prandial glucose concentrations following high compared with moderate intensity exercise and Control (Fig 1).

**Table 1. Subject Characteristics.**

|                                      | Control     | Females     | Males        |
|--------------------------------------|-------------|-------------|--------------|
| N, (M/F)                             | 15          | 8F          | 7M           |
| Age (years)                          | 49.9 ± 3.6  | 48.1 ± 5.2  | 52.0 ± 5.4   |
| Height (cm)                          | 169.2 ± 2.9 | 161.8 ± 2.9 | 177.7 ± 3.0* |
| Body weight (kg)                     | 91.6 ± 4.5  | 85.4 ± 7.3  | 98.7 ± 3.9   |
| Body mass index (kg/m <sup>2</sup> ) | 31.0 ± 1.5  | 32.5 ± 2.5  | 30.0 ± 1.6   |
| Fat mass (kg)                        | 37.5 ± 2.8  | 37.4 ± 4.5  | 37.6 ± 3.5   |
| Fat-free mass (kg)                   | 54.0 ± 2.4  | 47.9 ± 3.0  | 61.0 ± 1.7*  |
| Body fat (%)                         | 40.6 ± 1.5  | 43.1 ± 1.7  | 37.7 ± 2.4   |
| VO <sub>2</sub> peak (L/min)         | 2.1 ± 0.1   | 1.9 ± 0.1   | 2.3 ± 0.1    |
| VO <sub>2</sub> peak (mg/kg/min)     | 23.2 ± 1.2  | 23.1 ± 1.7  | 23.4 ± 1.9   |
| <i>OGTT Screening</i>                |             |             |              |
| FPG (mg/dl)                          | 105.2 ± 2.9 | 105.3 ± 3.9 | 105.0 ± 4.8  |
| 2-hour PG (mg/dl)                    | 170.2 ± 8.8 | 170.2 ± 8.8 | 155.0 ± 13.9 |
| HbA <sub>1c</sub> (%)                | 5.7 ± 0.1   | 5.7 ± 0.1   | 5.6 ± 0.1    |

Data are expressed as mean ± SEM. Sex differences were compared with independent *t*-test.

\*Compared with Females (P<0.05).

doi:10.1371/journal.pone.0154063.t001

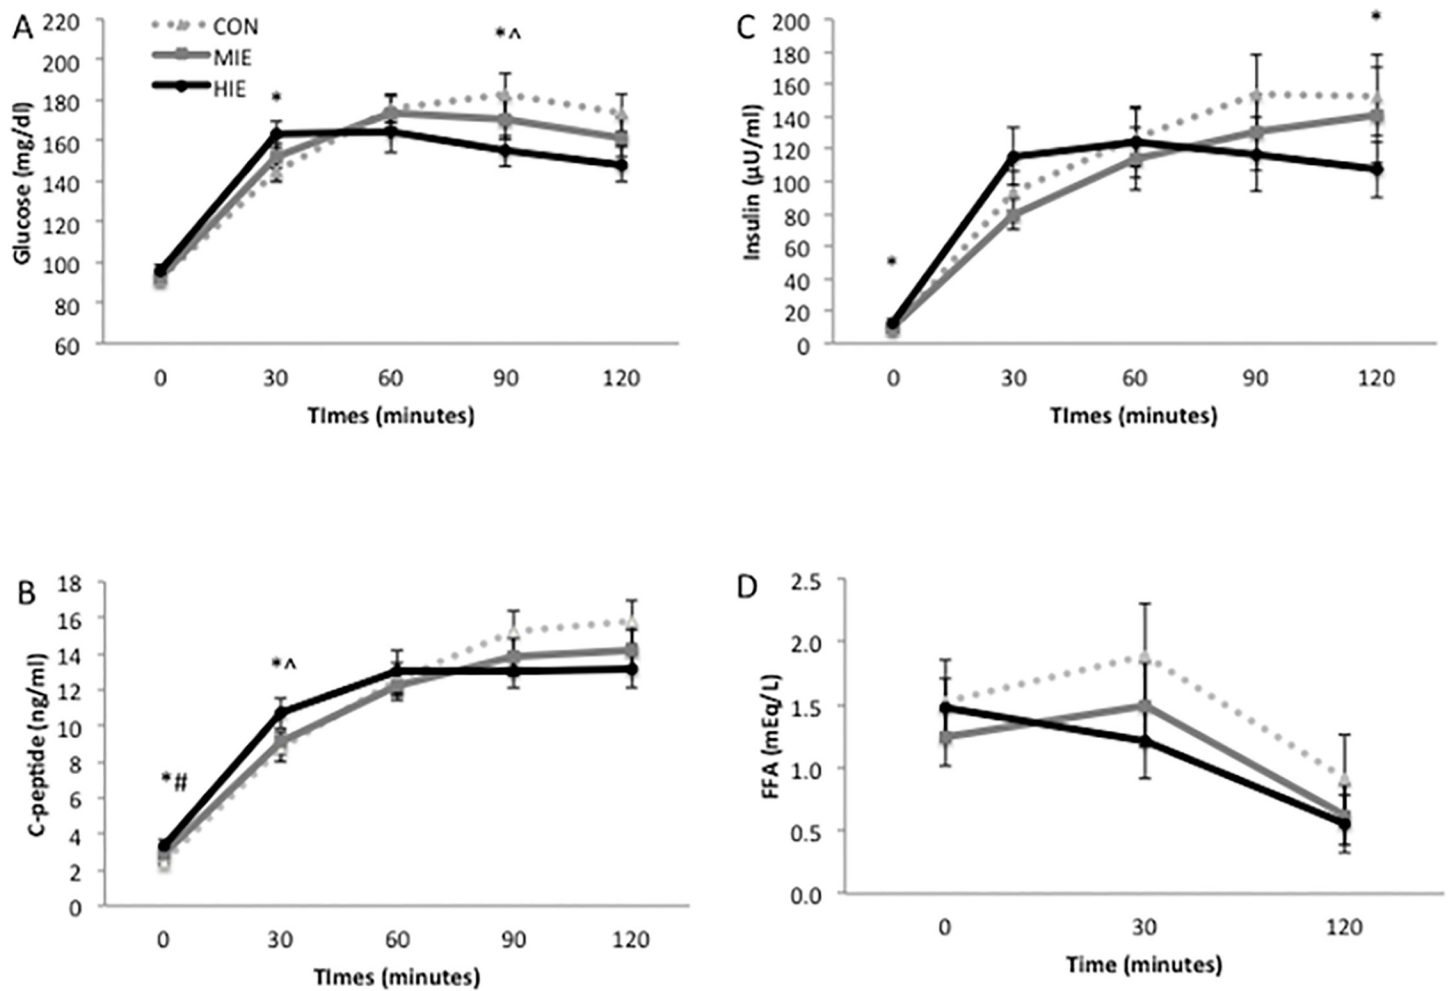

**Fig 1. Effect of exercise intensity on plasma glucose, insulin, C-peptide and FFA.** FFA = free fatty acids. \*Compared to Control,  $P < 0.05$ . ^Compared to MIE,  $P < 0.05$ .

doi:10.1371/journal.pone.0154063.g001

Plasma insulin was significantly higher prior to the OGTT following high intensity exercise compared to Control, although insulin levels were lower towards the later portion of the test (Fig 1). Fasting FFA concentrations were not statistically different across conditions, although exercise reduced FFA AUC following moderate and high intensity exercise ( $P < 0.05$ , Table 2).

### Insulin Resistance

Skeletal muscle insulin resistance decreased by  $19.5 \pm 8.3\%$  and  $28.5 \pm 11.3\%$  after moderate and high intensity exercise respectively compared with Control and independent of sex ( $P < 0.05$ , Fig 2). Hepatic insulin resistance was not altered following moderate intensity exercise compared with Control, but increased following high intensity exercise ( $P < 0.05$ , Fig 2). Adipose insulin resistance also rose significantly after high intensity exercise ( $P < 0.05$ ), but not moderate intensity exercise or Control.

### Pancreatic $\beta$ -cell Function

Early phase insulin secretion rates were increased following high intensity exercise, whereas exercise, particularly high intensity, lowered total phase insulin secretion rates compared with

**Table 2. Area under the curve from the OGTT before and after exercise at different intensities.**

|                                               | Control             | MIE                  | HIE                 |
|-----------------------------------------------|---------------------|----------------------|---------------------|
| <i>Early Phase Responses</i>                  |                     |                      |                     |
| Glucose AUC <sub>0-30</sub> (mg/dl*30min)     | 3561.5 ± 100.0      | 3672.1 ± 117.1       | 3882.0 ± 141.9*     |
| Insulin AUC <sub>0-30</sub> (μU/ml*30min)‡    | 1358 [1001, 1990]   | 1388.0 [846.6, 1611] | 1538 [1097, 2576]*  |
| C-peptide AUC <sub>0-30</sub> (ng/ml*30min)   | 168.2 ± 11.7        | 180.1 ± 11.7         | 210.4 ± 13.8*^      |
| ISR AUC <sub>0-30</sub> (ng/ml*30min)         | 24946.9 ± 2158.9    | 22922.3 ± 1585.9     | 29256.4 ± 3158.2    |
| P-FFA AUC <sub>0-30</sub> (mEq/ml*30min)      | 51.2 ± 10.5         | 41.0 ± 8.0           | 40.4 ± 7.5          |
| HC AUC <sub>0-30</sub>                        | 0.13 ± 0.01         | 0.15 ± 0.01          | 0.13 ± 0.01         |
| <i>Total Phase Responses</i>                  |                     |                      |                     |
| Glucose AUC <sub>0-120</sub> (mg/dl*120min)   | 19116.2 ± 734.7     | 18734.2 ± 760.7      | 18156.2 ± 780.3     |
| Insulin AUC <sub>0-120</sub> (mg/dl*120min)‡  | 12910 [8450, 15460] | 10080 [7758, 12290]  | 10560 [9374, 12640] |
| C-peptide AUC <sub>0-120</sub> (ng/ml*120min) | 1368.9 ± 91.9       | 1313.6 ± 85.7        | 1349.5 ± 92.4       |
| ISR AUC <sub>0-120</sub> (ng/ml*120min)       | 161794.3 ± 12043.5  | 142435.4 ± 10755.0*  | 141838.1 ± 9505.4*  |
| P-FFA AUC <sub>0-120</sub> (mEq/ml*120min)    | 177.6 ± 41.2        | 136.5 ± 33.3*        | 120.2 ± 31.0*       |
| HC AUC <sub>0-120</sub>                       | 0.12 ± 0.01         | 0.13 ± 0.01          | 0.12 ± 0.01         |

Data are expressed as mean ± SEM or median (IQR) when appropriate.

‡Data log-transformed for statistical analysis. Conditions were compared by analysis of variance (ANOVA). MIE = moderate exercise intensity. HIE = high exercise intensity. FFA = free fatty acid. AUC = total area under the curve. HC = hepatic insulin clearance.

\*Compared to Control, P<0.05.

^Compared to MIE, P<0.05.

doi:10.1371/journal.pone.0154063.t002

Control independent of sex (P<0.05, Fig 3 and Table 2). Hepatic and adipose disposition index was significantly reduced following high intensity exercise compared with Control, independent of sex (Fig 4) Moderate intensity exercise had no effect on hepatic or adipose disposition index compared with Control. Early and total phase skeletal muscle disposition index increased in an intensity based manner (Fig 4) compared with Control independent of sex.

## Discussion

The major finding from the present study is that a single high intensity exercise bout lowers GSIS relative to hepatic and adipose tissue insulin resistance when compared to an isocaloric matched moderate bout in adults with prediabetes independent of sex. In contrast, moderate and high intensity exercise increases GSIS when adjusted for changes in skeletal muscle insulin resistance compared with control. Together, these data suggest that compensatory mechanisms may exist for changes between skeletal, liver, adipose and the pancreas to support glucose homeostasis following acute exercise in an intensity based manner. Our findings are consistent with some [7,16,17] but not all [7] who report that greater volumes/intensities of exercise training increase β-cell function in overweight people. In fact, our findings confirm recent work showing that an acute bout of moderate intensity exercise has little effect on pancreatic function in people with prediabetes [18]. Prior studies reporting increases in pancreatic function following higher doses/intensities of exercise used the OGTT, whereas studies reporting little or no change used the intravenous glucose tolerance test or hyperglycemic clamp, respectively [7,16,17]. To that end, this prior work also used the intravenous glucose tolerance test, hyperglycemic and euglycemic clamp as well as HOMA to characterize insulin resistance. Notwithstanding the fact that pancreatic function derived from the clamp and intravenous glucose tolerance test are dependent on β-cell glucose responsiveness and the readily available release of insulin, whereas the OGTT also reflects the processing and synthesis of new insulin as well

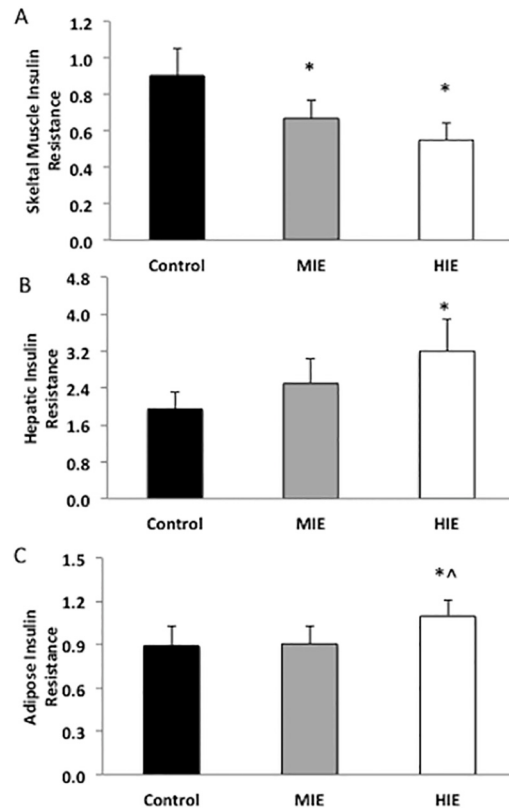

**Fig 2. Effect of exercise intensity on multi-organ insulin resistance.** Data are expressed as mean  $\pm$  SEM. OMM = oral minimal model was calculated from plasma glucose and insulin to measure skeletal muscle insulin resistance. Homeostatic model of insulin resistance (HOMR-IR) was calculated as fasting PG  $\times$  fasting PI to depict hepatic insulin resistance. Adipose-IR was calculated as fasting FFA  $\times$  fasting PI to determine adipose insulin resistance. \*Compared to Control,  $P < 0.05$ . ^Compared to MIE,  $P < 0.05$ .

doi:10.1371/journal.pone.0154063.g002

as evoking incretin and neural effects on the pancreas, different methodological measures of insulin resistance make comparisons between studies difficult. Our results suggest that acute exercise may independently affect GSIS in a tissue-specific manner and that the pancreatic function response after exercise may relate to the origin and/or degree of insulin resistance.

Insulin resistance promotes adjustments in insulin secretion to preserve blood glucose control [30]. In the current study, hepatic and adipose insulin resistance increased following high intensity exercise compared with control or moderate intensity exercise. While this transient insulin resistance may seem contradictory to the beneficial effects of exercise on insulin action, prior studies have reported that exercise increases hepatic glucose production and raises lipolysis in the immediate post-exercise interval in an intensity dependent manner [31–33]. In fact, elevations in growth hormone, cortisol and catecholamines provoked by high intensity exercise may contribute to this phenomenon as well as attenuate skeletal muscle glucose uptake [31–35]. However, this transient tissue-specific insulin resistance in the post-exercise period likely serves to support energy production and spare carbohydrate for glycogen restoration in skeletal muscle [31,36]. Moreover, the increase in FFA may alter hepatic lipid storage and/or insulin resistance to some extent to support blood glucose [37–39]. Nevertheless, it is important to recognize that skeletal muscle insulin resistance was significantly reduced following both moderate and high intensity exercise and blood glucose was lower in the late post-prandial period [19]. To this end, it is important to acknowledge that muscle contraction increases glucose

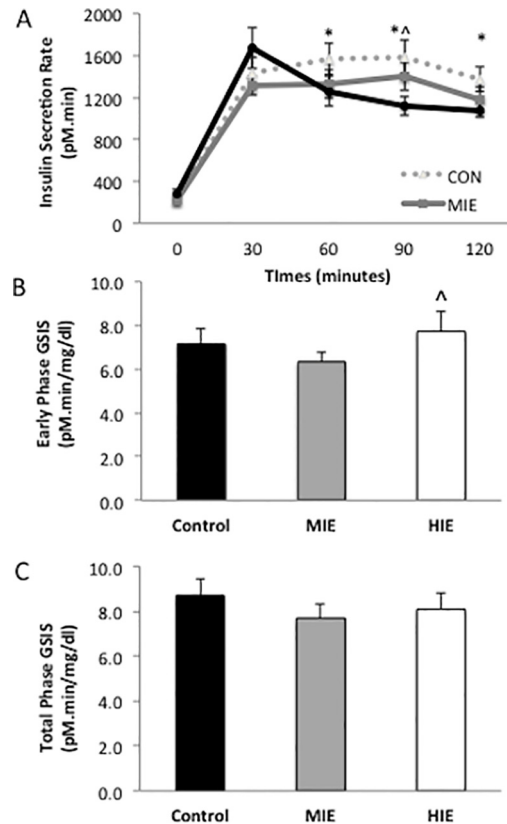

**Fig 3. Effect of exercise intensity on glucose-stimulated insulin secretion.** Data are expressed as mean  $\pm$  SEM. ISR = insulin secretion rate derived from deconvolution of plasma C-peptide. GSIS = glucose-stimulated insulin secretion rate (ISR; total AUC C-peptide divided by total AUC Glucose). \*Compared to Control,  $P < 0.05$ .

doi:10.1371/journal.pone.0154063.g003

uptake and this insulin-independent glucose disposal can persist during the post-exercise period for a few hours depending on the intensity [40]. As a result, it is likely that our observation of reduced skeletal muscle insulin resistance is to some extent exaggerated between exercise conditions by increased GLUT-4 translocation to the plasma membrane and not reflective of “true” insulin sensitivity [41,42]. Indeed, it is likely that high intensity exercise resulted in higher glycogen breakdown and promoted increased GLUT-4 compared with moderate intensity exercise thereby contributing to favorable post-prandial glucose responses. This raises important questions on the role of nutrient timing on enhancing the effect of exercise to promote insulin sensitivity. Prior studies have attempted to identify if feeding immediately post-exercise increases skeletal muscle insulin sensitivity into the next day compared with nutrient intake before or approximately 3 hours after exercise [43]. Stephens et al. [43] demonstrated that immediate feeding post-exercise had the greatest effect on skeletal muscle insulin sensitivity in overweight insulin resistant adults. Whether feeding immediately post-exercise has differential effects on insulin metabolism in an exercise intensity based manner though is unclear, particularly in a clinical population of adults with prediabetes. Herein, we show that high intensity exercise does appear to have more profound effects on insulin metabolism during the recovery period than moderate intensity exercise, and this may in part explain improved glucose tolerance.



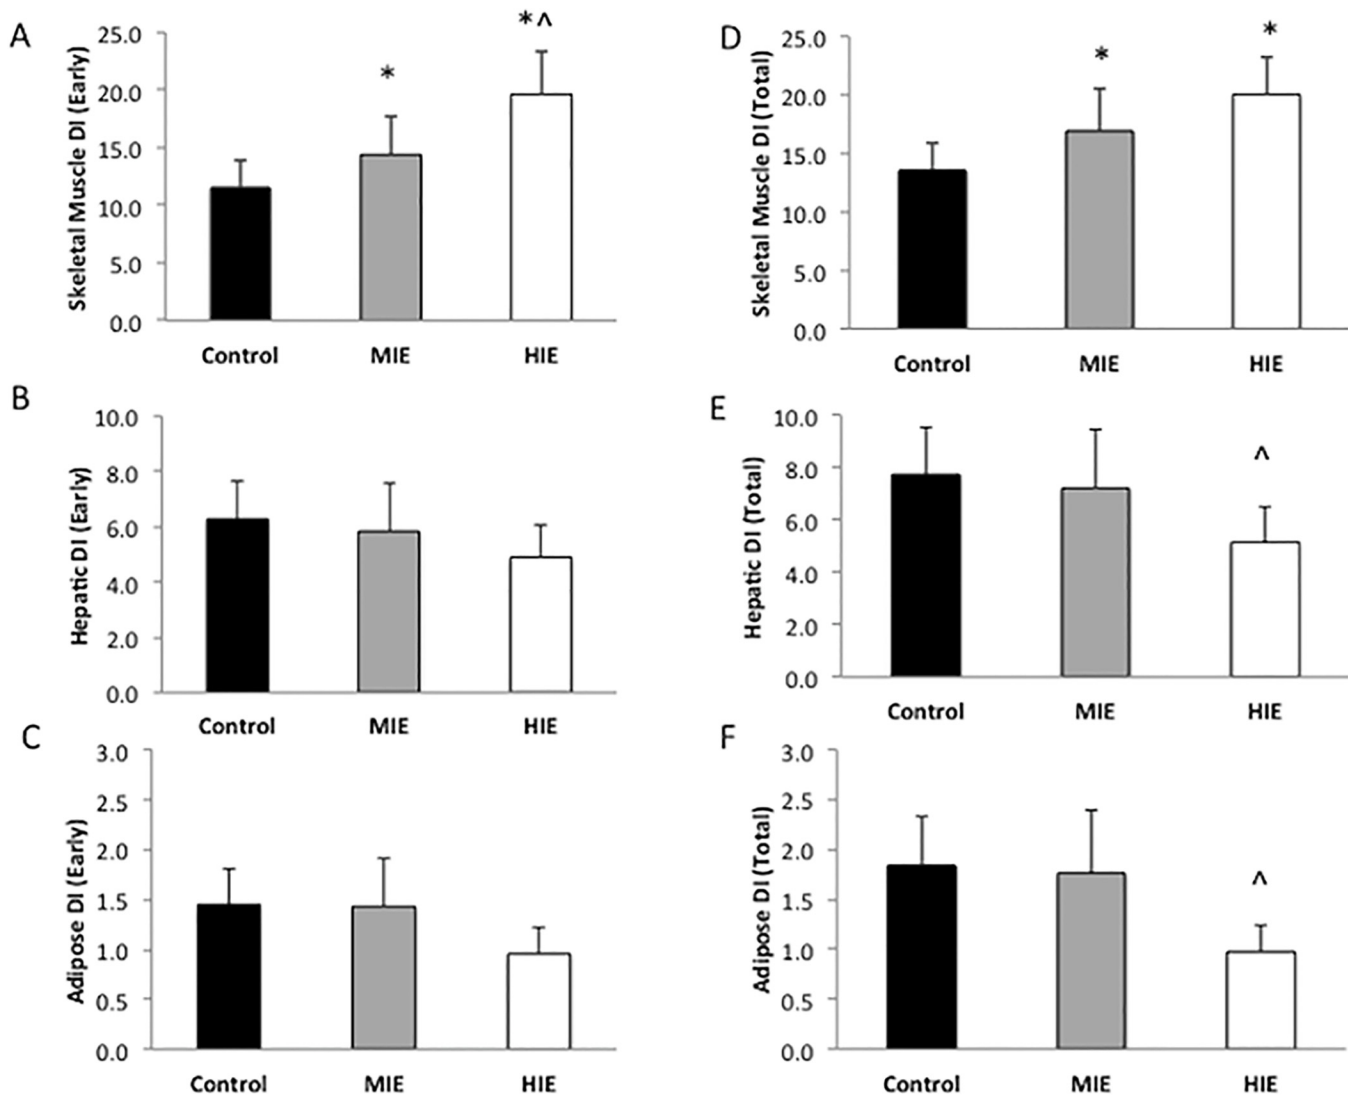

**Fig 4. Effect of exercise intensity on  $\beta$ -cell function.** Data are expressed as mean  $\pm$  SEM. DI = disposition index and was used to characterize pancreatic  $\beta$ -cell function. Skeletal muscle DI was calculated as AUC of ISR/Glucose  $\times$  oral glucose minimal model. Hepatic DI was estimated as AUC of ISR/Glucose  $\times$  HOMA-IR. Adipose DI was determined as AUC of ISR/Glucose  $\times$  Adipose-IR. \*Compared to Control,  $P < 0.05$ . ^Compared to MIE,  $P < 0.05$ .

doi:10.1371/journal.pone.0154063.g004

Habitual exercise increases  $\beta$ -cell function in people with prediabetes [7,16] and type 2 diabetes [8,44]. In fact, prior work suggests that individuals with low baseline  $\beta$ -cell function are likely to improve  $\beta$ -cell function following exercise training [7,16]. This later point is clinically relevant, as even small amounts of exercise could benefit  $\beta$ -cell function [7,16]. However, whether acute exercise at a relatively low dose (i.e. 200-kcal) of different intensities modifies the insulin secretion response in people with prediabetes is not presently clear [23]. The current results show that performing a low dose of moderate or high intensity exercise may induce benefit for insulin secretion when adjusted to skeletal muscle, but not liver or adipose, insulin resistance in people with reduced  $\beta$ -cell function. Given the little to no change in GSIS following exercise, our results suggest that the overall net increase in insulin sensitivity may be the most important factor contributing to changes in pancreatic function following acute exercise at low doses, and skeletal muscle is likely a key driver of this process. Our current observation is

consistent with prior studies assessing GSIS in conjunction with the euglycemic clamp and intravenous glucose tolerance test (which typically reflect skeletal muscle glucose disposal) and suggests that exercise may influence cross-talk between muscle and pancreas to improve glucose regulation [45–47]. However, we recognize that manipulation of nutritional composition and/or changes in physical inactivity may affect insulin secretion adjusted for liver insulin resistance [24,25].

Lipotoxicity has been implicated in the cause of pancreatic dysfunction [48–50]. The rise in FFA levels seen here with exercise may explain the lowering of hepatic and adipose disposition index estimates. Several studies show that FFA turnover is increased following high intensity exercise [31,36], and some but not all work suggests that exercise reduces circulating FFAs due to either increases in skeletal muscle intramuscular fat storage [51] and/or changes in hepatic fat accumulation [37–39]. Although the lowering of FFA concentrations in the post-exercise may contribute to whole-body improvements in pancreatic function [52], we report that FFA AUC declined similarly during the OGTT following both moderate and high intensity exercise. This suggests that FFAs per se are unlikely to have uniquely changed pancreatic function during high intensity exercise. Alternatively, recent work has suggested that elevated FFAs in the immediate post-exercise provide an energy source to peripheral organs (e.g. skeletal muscle) in effort to restore glycogen concentrations [36]. Indeed, we report significant rises in glucose AUC up to 30 minutes into the OGTT following high intensity exercise, which is consistent with increased rates of meal glucose appearance from the gut following exercise [53,54]. Interestingly enough, this rise in blood glucose is mirrored by increased insulin secretion, which explains why GSIS was not altered or slightly increased by moderate and high intensity exercise. However, the improvement in overall post-prandial glucose occurred during the later portion of the OGTT, suggesting that insulin acted in a coordinated and temporal manner to maintain glucose homeostasis. This is physiologically relevant since the disposition index was originally developed [10,29] as the inverse of GSIS and insulin resistance to reflect the integrated capacity for whole-body glucose disposal. The current work expands upon this concept and suggests that the indices used to assess insulin resistance during fasting and post-prandial conditions may offer insight to the tissues that contribute to glucose regulation [10].

There are limitations in this study that may affect our interpretations. We used surrogate measures of liver and adipose insulin resistance that may underestimate true changes in insulin action, and stable isotopes are needed to assesses skeletal muscle glucose uptake, hepatic glucose production and lipolytic rate to tease out the role of distinct tissues influencing pancreatic function. However, HOMA-IR and Adipose-IR are valid approaches to estimate hepatic and adipose insulin resistance, respectively, and surrogate measures of adipose insulin resistance and adipose disposition index correlate strongly with palmitate stable isotope turnover measures to characterize pancreatic function [55]. Moreover, the oral minimal model has been validated against the glucose clamp, which is suggested to provide insight to skeletal muscle glucose disposal whereas HOMA-IR is reflective of hepatic glucose production [12,26]. Further, glycerol may represent a more accurate biomarker of lipolysis because plasma FFA can be re-esterified and/or taken up for storage thereby limiting FFA as a lipolytic marker. It is important to acknowledge, nevertheless, that FFAs are released from adipocytes, and have a role in the development of pancreatic dysfunction [48–50]. We cannot exclude the possibility that changes in blood flow during the immediate post-exercise period may have contributed to differences in our indices of multi-organ insulin resistance. However, prior work suggests that changes in blood flow during exercise return from the periphery to the central organs (e.g. liver and adipose) within approximately 30–180 minutes post-exercise. This restoration of blood flow to adipose tissue is considered a key mechanism that accounts for elevated FFA concentrations that provide an energy source to the liver and skeletal muscle [36,56,57]. Given that FFA

were not statistically different between exercise intensities 60 minutes post-exercise, differences in blood flow on indices of insulin resistance would seem minimal. Nevertheless, future work is needed following exercise to understand the role of blood flow on multi-organ insulin resistance and  $\beta$ -cell insulin metabolism [58]. We also used the OGTT to assess pancreatic function, and it is possible that exercise altered incretin hormones (e.g. GLP-1 and GIP) that resulted in overestimated changes in insulin secretion compared with intravenous glucose methods. Unfortunately, additives for incretin blood sample analysis were not utilized and we are unable to determine the roles of incretins on pancreatic function. However, use of oral carbohydrates increases the physiologic relevance of our study and provide “real-world” findings.

## Conclusion

Acute exercise decreases pancreatic insulin secretion relative to changes in adipose and hepatic insulin resistance in an intensity dependent manner, whereas moderate and high intensity exercise increases insulin secretion when adjusted for changes in skeletal muscle insulin resistance. Together, these data indicate that exercise intensity adjusts pancreatic insulin secretion uniquely between glucose regulatory tissues in the immediate post-exercise period to favor glycemic control in people with prediabetes. Further work is merited to understand cross-talk between skeletal muscle, liver and adipose tissue with pancreatic  $\beta$ -cells in order to design more effective treatments that prevent/treat type 2 diabetes.

## Supporting Information

**S1 Table. Data for plasma glucose, insulin, C-peptide and FFA across conditions.**

(PDF)

**S2 Table. Data for glucose-stimulated insulin secretion across conditions.**

(PDF)

**S3 Table. Data for insulin resistance across conditions.**

(PDF)

**S4 Table. Data for  $\beta$ -cell function across conditions.**

(PDF)

## Acknowledgments

We thank the nursing staff of the Clinical Research Unit for technical assistance, and the dedicated research assistants and participants for their effort.

## Author Contributions

Conceived and designed the experiments: SKM CAR EJB AW. Performed the experiments: JYW CAR. Analyzed the data: SKM CAR JYW. Contributed reagents/materials/analysis tools: SKM CAR JYW EJB AW. Wrote the paper: SKM CAR JYW EJB AW.

## References

1. Tabak AG, Herder C, Rathmann W, Brunner EJ, Kivimaki M. Prediabetes: a high-risk state for diabetes development. *Lancet* 2012; 379(9833):2279–2290. doi: [10.1016/S0140-6736\(12\)60283-9](https://doi.org/10.1016/S0140-6736(12)60283-9) PMID: [22683128](https://pubmed.ncbi.nlm.nih.gov/22683128/)
2. Standards of medical care in diabetes-2015: summary of revisions. *Diabetes Care* 2015; 38 Suppl:S4. doi: [10.2337/dc15-S003](https://doi.org/10.2337/dc15-S003) PMID: [25537706](https://pubmed.ncbi.nlm.nih.gov/25537706/)

3. Lorenzo C, Hartnett S, Hanley A, Rewers M, Wagenknecht L, Karter A, et al. Impaired fasting glucose and impaired glucose tolerance have distinct lipoprotein and apolipoprotein changes: the insulin resistance atherosclerosis study. *J Clin Endocrinol Metab* 2013; 98(4):1622–1630. doi: [10.1210/jc.2012-3185](https://doi.org/10.1210/jc.2012-3185) PMID: [23450048](https://pubmed.ncbi.nlm.nih.gov/23450048/)
4. Abdul-Ghani MA, DeFronzo RA. Pathophysiology of prediabetes. *Current diabetes report* 2009; 9(3):193–199.
5. DeFronzo RA, Abdul Ghani MA. Preservation of  $\beta$ -cell function: the key to diabetes prevention. *J Clin Endocrinol Metab* 2011; 96(8):2354–2366. doi: [10.1210/jc.2011-0246](https://doi.org/10.1210/jc.2011-0246) PMID: [21697254](https://pubmed.ncbi.nlm.nih.gov/21697254/)
6. King DS, Staten MA, Kohrt WM, Dalsky GP, Elahi D, Holloszy JO. Insulin secretory capacity in endurance-trained and untrained young men. *Am J Physiol* 1990; 259(2):E155–E161. PMID: [2200274](https://pubmed.ncbi.nlm.nih.gov/2200274/)
7. Slentz CA, Tanner CJ, Bateman LA, Durheim MT, Huffman KM, Houmard JA, et al. Effects of exercise training intensity on pancreatic beta-cell function. *Diabetes Care* 2009; 32(10):1807–1811. doi: [10.2337/dc09-0032](https://doi.org/10.2337/dc09-0032) PMID: [19592624](https://pubmed.ncbi.nlm.nih.gov/19592624/)
8. Dela F, von Linstow ME, Mikines KJ, Galbo H. Physical training may enhance beta-cell function in type 2 diabetes. *Am J Physiol Endocrinol Metab* 2004; 287(5):E1024–E1031. PMID: [15251867](https://pubmed.ncbi.nlm.nih.gov/15251867/)
9. Bloem C, Chang A. Short-term exercise improves beta-cell function and insulin resistance in older people with impaired glucose tolerance. *J Clin Endocrinol Metab* 2008; 93(2):387–392. PMID: [18000089](https://pubmed.ncbi.nlm.nih.gov/18000089/)
10. Kahn SE, Prigeon RL, McCulloch DK, Boyko EJ, Bergman RN, Schwartz MW, et al. Quantification of the relationship between insulin sensitivity and beta-cell function in human subjects. Evidence for a hyperbolic function. *Diabetes* 1993; 42(11):1663–1672. PMID: [8405710](https://pubmed.ncbi.nlm.nih.gov/8405710/)
11. Utzschneider KM, Prigeon RL, Faulenbach MV, Tong J, Carr DB, Boyko EJ, et al. Oral disposition index predicts the development of future diabetes above and beyond fasting and 2-h glucose levels. *Diabetes Care* 2009; 32(2):335–341. doi: [10.2337/dc08-1478](https://doi.org/10.2337/dc08-1478) PMID: [18957530](https://pubmed.ncbi.nlm.nih.gov/18957530/)
12. Abdul-Ghani MA, Matsuda M, Balas B, DeFronzo RA. Muscle and liver insulin resistance indexes derived from the oral glucose tolerance test. *Diabetes Care* 2007; 30(1):89–94. PMID: [17192339](https://pubmed.ncbi.nlm.nih.gov/17192339/)
13. Magkos F, Tsekouras Y, Kavouras S, Mittendorfer B, Sidossis L. Improved insulin sensitivity after a single bout of exercise is curvilinearly related to exercise energy expenditure. *Clin Sci* 2008; 114(1):59–64. PMID: [17635103](https://pubmed.ncbi.nlm.nih.gov/17635103/)
14. Amati F, Dube, Alvarez Carnero E, Edreira MM, Chomentowski P, Coen PM, et al. Skeletal muscle triglycerides, diacylglycerols, and ceramides in insulin resistance: another paradox in endurance-trained athletes? *Diabetes* 2011; 60(10):2588–2597. doi: [10.2337/db10-1221](https://doi.org/10.2337/db10-1221) PMID: [21873552](https://pubmed.ncbi.nlm.nih.gov/21873552/)
15. Hamer M, Stamatakis E. Low-dose physical activity attenuates cardiovascular disease mortality in men and women with clustered metabolic risk factors. *Circ Cardiovasc Qual Outcomes* 2012; 5(4):494–499. doi: [10.1161/CIRCOUTCOMES.112.965434](https://doi.org/10.1161/CIRCOUTCOMES.112.965434) PMID: [22619275](https://pubmed.ncbi.nlm.nih.gov/22619275/)
16. Malin SK, Solomon TPJ, Blaszczyk A, Finnegan S, Filion J, Kirwan JP. Pancreatic beta cell function increases in a linear dose-response manner following exercise training in adults with prediabetes. *Am J Physiol Endocrinol Metab* 2013; 305(10):E1248–54. doi: [10.1152/ajpendo.00260.2013](https://doi.org/10.1152/ajpendo.00260.2013) PMID: [24045867](https://pubmed.ncbi.nlm.nih.gov/24045867/)
17. Davis C, Pollock N, Waller J, Allison J, Dennis BA, Bassali R, et al. Exercise dose and diabetes risk in overweight and obese children: a randomized controlled trial. *JAMA*, 2012; 308(11):1103–1112. PMID: [22990269](https://pubmed.ncbi.nlm.nih.gov/22990269/)
18. Knudsen S, Karstoft K, Pedersen B, van Hall G, Solomon TPJ. The immediate effects of a single bout of aerobic exercise on oral glucose tolerance across the glucose tolerance continuum. *Physiological Reports* 2014; 2(8).
19. Rynders CA, Weltman JY, Jiang B, Breton M, Patrie J, Barrett EJ, et al. Effects of exercise intensity on postprandial improvement in glucose disposal and insulin sensitivity in prediabetic adults. *J Clin Endocrinol Metab* 2014; 99(1):220–8. doi: [10.1210/jc.2013-2687](https://doi.org/10.1210/jc.2013-2687) PMID: [24243632](https://pubmed.ncbi.nlm.nih.gov/24243632/)
20. Irving BA, Davis CK, Brock DW, Weltman JY, Swift D, Barrett EJ, et al. Effect of exercise training intensity on abdominal visceral fat and body composition. *Med Sci Sports Exerc* 2008; 40(11):1863–72. doi: [10.1249/MSS.0b013e3181801d40](https://doi.org/10.1249/MSS.0b013e3181801d40) PMID: [18845966](https://pubmed.ncbi.nlm.nih.gov/18845966/)
21. Malin SK, Gerber R, Chipkin SR, Braun B. Independent and Combined Effects of Exercise Training and Metformin on Insulin Sensitivity in Individuals With Prediabetes. *Diabetes Care* 2012; 35(1):131–6. doi: [10.2337/dc11-0925](https://doi.org/10.2337/dc11-0925) PMID: [22040838](https://pubmed.ncbi.nlm.nih.gov/22040838/)
22. Mikus CR, Boyle LJ, Borengasser SJ, Oberlin DJ, Naples SP, Fletcher J, et al. Simvastatin impairs exercise training adaptations. *J Am Coll Cardiol* 2013; 62(8):709–14. doi: [10.1016/j.jacc.2013.02.074](https://doi.org/10.1016/j.jacc.2013.02.074) PMID: [23583255](https://pubmed.ncbi.nlm.nih.gov/23583255/)
23. Knudsen SH, Karstoft K, Winding K, Holst JJ, Pedersen BK, Solomon TPJ. Effects of acute exercise on pancreatic endocrine function in subjects with type 2 diabetes. *Diabetes Obes Metab* 2015; 17(2):207–10. doi: [10.1111/dom.12413](https://doi.org/10.1111/dom.12413) PMID: [25406646](https://pubmed.ncbi.nlm.nih.gov/25406646/)

24. Brons C, Jensen CB, Storgaard H, Hiscock NJ, White A, Appel JS, et al. Impact of short-term high-fat feeding on glucose and insulin metabolism in young healthy men. *J Physiol* 2009; 587(10):2387–2397.
25. Faerch K, Brns C, Alibegovic AC, Vaag A. The disposition index: adjustment for peripheral vs. hepatic insulin sensitivity? *J Physiol* 2010; 588(5):759–764.
26. Dalla Man C, Yarasheski KE, Caumo A, Robertson H, Toffolo G, Polonsky K, et al. Insulin sensitivity by oral glucose minimal models: validation against clamp. *Am J Physiol Endocrinol Metab* 2005; 289(6): E954–9. PMID: [16014353](#)
27. Van Cauter E, Mestrez F, Sturis J, Polonsky KS. Estimation of insulin secretion rates from C-peptide levels. Comparison of individual and standard kinetic parameters for C-peptide clearance. *Diabetes* 1992; 41(3):368–377. PMID: [1551497](#)
28. Solomon TP, Malin SK, Karstoft K, Knudsen SH, Haus JM, Laye MJ, et al. Determining pancreatic beta-cell compensation for changing insulin sensitivity using an oral glucose tolerance test. *Am J Physiol Endocrinol Metab* 2014; 307(9):E822–9. doi: [10.1152/ajpendo.00269.2014](#) PMID: [25184989](#)
29. Cobelli C, Toffolo GM, Dalla Man C, Campioni M, Denti P, Caumo A, et al. Assessment of beta-cell function in humans, simultaneously with insulin sensitivity and hepatic extraction, from intravenous and oral glucose tests. *Am J Physiol Endocrinol Metab* 2007; 293(1):E1–E15. PMID: [17341552](#)
30. Kanat M, Norton L, Winnier D, Jenkinson C, DeFronzo RA, Abdul Ghani MA. Impaired early- but not late-phase insulin secretion in subjects with impaired fasting glucose. *Acta Diabetol* 2011; 48(3):209–217. doi: [10.1007/s00592-011-0285-x](#) PMID: [21553243](#)
31. Marion-Latard F, Crampes F, Zakaroff-Girard A, De Glisezinski I, Harant I, Stich V, et al. Post-exercise increase of lipid oxidation after a moderate exercise bout in untrained healthy obese men. *Horm Metab Res* 2003; 35(2):97–103. PMID: [12734789](#)
32. Weltman A, Weltman JY, Roy CP, Wideman L, Patrie J, Evans WS, Veldhuis JD. Growth hormone response to graded exercise intensities is attenuated and the gender difference abolished in older adults. *J Appl Physiol* 2006; 100(5):1623–9. PMID: [16384836](#)
33. Bahr R, Høstmark AT, Newsholme EA, Grønnerød O, Sejersted OM. Effect of exercise on recovery changes in plasma levels of FFA, glycerol, glucose and catecholamines. *Acta Physiol Scand* 1991; 143(1):105–15. PMID: [1957696](#)
34. Hunt DG, Ivy JL. Epinephrine inhibits insulin-stimulated muscle glucose transport. *J Appl Physiol* (1985) 2002; 93(5):1638–1643.
35. Marliss EB, Vranic M. Intense exercise has unique effects on both insulin release and its roles in glucoregulation: implications for diabetes. *Diabetes* 2002; 51 Suppl 1:S271–83. PMID: [11815492](#)
36. Kimber NE, Heigenhauser GJ, Spriet LL, Dyck DJ. Skeletal muscle fat and carbohydrate metabolism during recovery from glycogen-depleting exercise in humans. *J Physiol* 2003; 548(Pt 3):919–927.
37. Bilet L, Brouwers B, van Ewijk PA, Hesselink MKC, Kooi ME, Schrauwen P, et al. Acute exercise does not decrease liver fat in men with overweight or NAFLD. *Sci Rep* 2015; 5:9709. doi: [10.1038/srep09709](#) PMID: [25866366](#)
38. Stefan N, Kantartzis K, Hring HU. Causes and metabolic consequences of Fatty liver. *Endocr Rev* 2008; 29(7):939–960. doi: [10.1210/er.2008-0009](#) PMID: [18723451](#)
39. Egger A, Kreis R, Allemann S, Stettler C, Diem P, Buehler T, et al. The effect of aerobic exercise on intrahepatocellular and intramyocellular lipids in healthy subjects. *PLoS ONE* 2013; 8(8):e70865. doi: [10.1371/journal.pone.0070865](#) PMID: [23967125](#)
40. Rose AJ, Richter EA. Skeletal muscle glucose uptake during exercise: how is it regulated? *Physiology* 2005 Aug; 20:260–270. PMID: [16024514](#)
41. Garetto LP, Richter EA, Goodman MN, Ruderman NB. Enhanced muscle glucose metabolism after exercise in the rat: the two phases. *Am J Physiol* 1984; 246(6 Pt 1):E471–5. PMID: [6377909](#)
42. Richter EA, Garetto LP, Goodman MN, Ruderman NB. Enhanced muscle glucose metabolism after exercise: modulation by local factors. *Am J Physiol* 1984; 246(6 Pt 1):E476–82. PMID: [6430094](#)
43. Stephens BR, Sautter JM, Holtz KA, Sharoff CG, Chipkin SR, Braun B. Effect of timing of energy and carbohydrate replacement on post-exercise insulin action. *Appl Physiol Nutr Metab* 2007; 32(6):1139–1147. PMID: [18059588](#)
44. Solomon TPJ, Haus JM, Kelly KR, Rocco M, Kashyap SR, Kirwan JP. Improved pancreatic beta-cell function in type 2 diabetic patients after lifestyle-induced weight loss is related to glucose-dependent insulinotropic polypeptide. *Diabetes Care* 2010; 33(7):1561–1566. doi: [10.2337/dc09-2021](#) PMID: [20200305](#)
45. Flier SN, Kulkarni RN, Kahn CR. Evidence for a circulating islet cell growth factor in insulin-resistant states. *Proc Natl Acad Sci U S A* 2001; 98(13):7475–7480. PMID: [11404474](#)

46. Mauvais Jarvis F, Virkamaki A, Michael MD, Winnay JN, Zisman A, Kulkarni RN, et al. A model to explore the interaction between muscle insulin resistance and beta-cell dysfunction in the development of type 2 diabetes. *Diabetes* 2000; 49(12):2126–2134. PMID: [11118016](#)
47. Handschin C, Choi CS, Chin S, Kim S, Kawamori D, Kurpad A, et al. Abnormal glucose homeostasis in skeletal muscle-specific PGC-1alpha knockout mice reveals skeletal muscle-pancreatic beta cell cross-talk. *J Clin Invest* 2007; 117(11):3463–3474. PMID: [17932564](#)
48. Muzumdar R, Ma X, Atzmon G, Vuguin P, Yang X, Barzilai N. Decrease in glucose-stimulated insulin secretion with aging is independent of insulin action. *Diabetes* 2004; 53(2):441–446. PMID: [14747296](#)
49. McGarry JD. Banting lecture 2001: dysregulation of fatty acid metabolism in the etiology of type 2 diabetes. *Diabetes* 2002; 51(1):7–18. PMID: [11756317](#)
50. Poitout V, Amyot J, Semache M, Zarrouki B, Hagman D, Fonte G. Glucolipotoxicity of the pancreatic beta cell. *Biochim Biophys Acta* 2010; 1801(3):289–298. doi: [10.1016/j.bbaliip.2009.08.006](#) PMID: [19715772](#)
51. Schenk S, Horowitz JF. Acute exercise increases triglyceride synthesis in skeletal muscle and prevents fatty acid-induced insulin resistance. *J Clin Invest* 2007; 117(6):1690–1698. PMID: [17510709](#)
52. Utzschneider KM, Carr DB, Hull RL, Kodama K, Shofer JB, Retzlaff BM, et al. Impact of intra-abdominal fat and age on insulin sensitivity and beta-cell function. *Diabetes* 2004; 53(11):2867–2872. PMID: [15504967](#)
53. Maehlum S, Felig P, Wahren J. Splanchnic glucose and muscle glycogen metabolism after glucose feeding during postexercise recovery. *Am J Physiol* 1978; 235(3):E255–E260. PMID: [696819](#)
54. Rose AJ, Howlett K, King DS, Hargreaves M. Effect of prior exercise on glucose metabolism in trained men. *Am J Physiol Endocrinol Metab.* 2001; 1(4):E766–71.
55. Malin SK, Kashyap SR, Hammel J, Miyazaki Y, DeFronzo RA, Kirwan JP. Adjusting Glucose-Stimulated Insulin Secretion for Adipose Insulin Resistance: An Index of  $\beta$ -Cell Function in Obese Adults. *Diabetes Care* 2014; 37(11):2940–6. doi: [10.2337/dc13-3011](#) PMID: [25139885](#)
56. Romijn JA, Coyle EF, Sidossis LS, Gastaldelli A, Horowitz JF, Endert E, et al. Regulation of endogenous fat and carbohydrate metabolism in relation to exercise intensity and duration. *Am J Physiol* 1993; 265(3 Pt 1):E380–91. PMID: [8214047](#)
57. Hodgetts V, Coppack SW, Frayn KN, Hockaday TD. Factors controlling fat mobilization from human subcutaneous adipose tissue during exercise. *J Appl Physiol* 1991; 71(2):445–451. PMID: [1938716](#)
58. Honka H, Hannukainen JC, Tarkia M, Karlsson H, Saunavaara V, Salminen P, et al. Pancreatic metabolism, blood flow, and  $\beta$ -cell function in obese humans. *J Clin Endocrinol Metab* 2014; 99(6):E981–90. doi: [10.1210/jc.2013-4369](#) PMID: [24527718](#)
